# Supplementary material for: iCOPE, a multi-level, cluster randomized, 36-month, parallel-group study to assess the efficacy of HIV disclosure intervention in HIV parental disclosure among parents living with HIV in China
Source: PubMed Central journal article supplement — SAGE Open Med. 2020 Feb 19;8:2050312120907821. doi: 10.1177/2050312120907821 (PMC7031783; doi:10.1177/2050312120907821), 2020-02-19
Supplement: parents_survey_english_sage_open_1.pdf [file parents_survey_english_sage_open_1.pdf]

### Health survey questionnaire (parents)\*

(To be completed by medical personnel, according to the medical record of case)

|                                      |                                           |                     |                    |
|--------------------------------------|-------------------------------------------|---------------------|--------------------|
| ID NO.                               |                                           | Subject gender      | ①Male      ②Female |
| Last CD4                             |                                           | Testing time        |                    |
| Recent viral load (VL)               |                                           | Testing time        |                    |
| Height                               | cm                                        | Weight              | kg                 |
| Have received antiretroviral therapy | ①Yes      ②No                             |                     |                    |
| Investigation site                   | ①Clinics      ②At home      ③Other places |                     |                    |
| Interview date                       | __(mm)/__(dd)/2015                        | Interviewer         |                    |
| Verification date                    | __(mm)/__(dd)/2015                        | Verification person |                    |

#### Part I Background

Q101. Gender:      1. Male      2. Female

Q102. Date of birth (DOB):      year      month

Q103. Age     

Q104. Does any of your family member know you are infected with HIV?

1. No one      2. Some of them      3. All

Q105. Is any of your family member (including those deceased) ever infected with HIV?

1. No one besides me      2. Yes, some of them; # (besides me)     

Q106. If you are married or have a regular partner (boyfriend or girlfriend), is he/she HIV-infected?

1. No      2. Yes      3. Don't know      4. unmarried and no regular sexual partner

Q107. Over the past 6 months, do health care providers hold positive attitudes toward you?

1. All of them      2. Most of them      3. Half of them      4. A few of them      5. None of them

Q108. Are you also suffering from the following diseases (please answer all the questions)?

|                      | Yes | No | Not sure |
|----------------------|-----|----|----------|
| Hepatitis A          | 1   | 2  | 3        |
| Hepatitis B          | 1   | 2  | 3        |
| Hepatitis C          | 1   | 2  | 3        |
| Tuberculosis         | 1   | 2  | 3        |
| Syphilis             | 1   | 2  | 3        |
| Gonorrhoea           | 1   | 2  | 3        |
| Genital herpes       | 1   | 2  | 3        |
| Other (state: _____) |     |    |          |

Q109. Over the past 6 months, have you seen or heard the following things in clinical setting?

|                                                                                                                 | Many times | Several times | Once or twice | None |
|-----------------------------------------------------------------------------------------------------------------|------------|---------------|---------------|------|
| Healthcare providers are unwilling to treat HIV-positive patients                                               | 1          | 2             | 3             | 4    |
| Healthcare providers have no patience with HIV-positive patients                                                | 1          | 2             | 3             | 4    |
| Healthcare providers hold negative attitudes towards HIV-positive patients (tone of talking, eye contact, etc.) | 1          | 2             | 3             | 4    |
| Healthcare providers don't take HIV-positive patients seriously when treating them                              | 1          | 2             | 3             | 4    |
| Healthcare providers intentionally keep a distance from HIV-positive patients when treating them                | 1          | 2             | 3             | 4    |
| Healthcare providers avoid body contact with HIV-positive patients when treating them                           | 1          | 2             | 3             | 4    |
| Healthcare providers wear double-layered gloves when treating HIV-positive patients                             | 1          | 2             | 3             | 4    |

## Part II Behaviors

Q201. Has the amount of your sex partners changed over the past 6 months?

1. More than before    2. Not changed, same as before    3. Less than before    4. No sex partners

Q202. Has your frequency of having sex changed over the past 6 months?

1. More than before    2. Not changed, same as before    3. Less than before    4. No sex

Q203. Has the frequency of your condom use changed over the past 6 months?

1. More than before    2. Not changed, same as before    3. Less than before    4. Never use condoms

Q204. Have you changed your smoking behavior over the past 6 months?

1. I started smoking    2. I smoked more than before    3. Not changed  
4. I smoked less than before    5. I quit smoking    6. I never smoke

Q205. Have you changed your alcohol drinking behavior over the past 6 months?

1. I started drinking alcohol    2. I drank alcohol more than before    3. Not changed  
4. I drank alcohol less than before    5. I quit drinking alcohol    6. I never drink alcohol

Q206. Have you changed your drug use behavior?

1. I started using drugs    2. I used drugs more than before    3. Not changed  
4. I used drugs less than before    5. I quit using drugs    6. I never use drugs

Q207. Do you often use the internet through computers?

1. I never use the internet    2. Less than once per month    3. Several times per month  
4. Several times per week    5. Almost everyday

Q208. What do you usually do on the internet? (multiple answers allowed)

1. Browsing webpages    2. Using search engine to look for information I want  
3. Entertainment (watching movies online, listening to music, taking photos)    4. Emailing  
5. Chatting (QQ, WeChat, Fetion)    6. Searching for HIV-related information  
7. I never use the internet through computers

Q209. Do you have a smart phone?

1. Yes    2. No    3. I don't know what a smart phone is

Q210. What do you usually do when using a smart phone? (**multiple answers allowed**)

1. Making phone calls    2. Message texting    3. Browsing webpages

4. Using search engine to look for information I want  
 5. Entertainment (watching movies online, listening to music, taking photos)      6. Emailing  
 7. Chatting (QQ, WeChat, Feion)      8. Searching for HIV-related information      9. I don't have a smart phone

Q211. Have you ever contacted with other HIV-positive patients via texting messages?  
 1. Yes      2. No      3. No cell phone

Q212. Have you ever asked your healthcare providers about medical information?  
 1. Yes      2. No      3. No cell phone

Q213. Have you ever contacted with other HIV-positive patients on the internet through smart phones or computers?  
 1. Never      2. Occasionally      3. Often      4. Almost every day      5. Never

Q214. Have you ever asked your healthcare providers about medical information on the internet through smart phones or computers?  
 1. Never      2. Occasionally      3. Often      4. Almost every day      5. Never

Q215. If we develop a website that provides support to HIV-infected patients, will you register, log in, and participate in related activities?  
 1. I will      2. I won't      3. I don't know

Q216. If we provide information on medical health to HIV-infected patients, which of the following ways do you prefer (allows multiple choices)?  
 1. Text message      2. Email      3. QQ message      4. Blog      5. WeChat      6. Unwilling to receive such information

**Part III Quality of life and physical activities**

Q301. Please rate your health status generally:      1. Excellent      2. Very good      3. Good      4. Fair      5. Poor

Q302. The following questions are about your daily activities. Does your health status impact the following activities?

|                                                                                                | Limited a lot | Limited a little | Not limited at all |
|------------------------------------------------------------------------------------------------|---------------|------------------|--------------------|
| Moderate or intense physical activities (e.g., moving tables, carrying food & groceries, etc.) | 1             | 2                | 3                  |
| Walking upslope or upstairs                                                                    | 1             | 2                | 3                  |

Q303. Over the past month, have you encountered any difficulty in work or other routine activities due to your health status?

|                                                  | Yes | No |
|--------------------------------------------------|-----|----|
| Completed less than expected                     | 1   | 2  |
| Certain types of work/activities were restricted | 1   | 2  |

Q304. Over the past month, did you encounter any difficulties in work or other routine activities due to emotional problems?

|                                                  | Yes | No |
|--------------------------------------------------|-----|----|
| Completed less than expected                     | 1   | 2  |
| Certain types of work/activities were restricted | 1   | 2  |

Q305. Over the past month, how often did you experience the following:

|                          | Always | Most of the time | Very often | Sometimes | Rarely | Never |
|--------------------------|--------|------------------|------------|-----------|--------|-------|
| Felt calm and peaceful   | 1      | 2                | 3          | 4         | 5      | 6     |
| Felt energetic           | 1      | 2                | 3          | 4         | 5      | 6     |
| Felt demoralized and sad | 1      | 2                | 3          | 4         | 5      | 6     |

Q306. Over the past month, how often did your physical and emotional problems affect your social activities (e.g., visiting relatives and friends)?

1. Always    2. Most of the time    3. Sometimes    4. Rarely    5. Never

Q307. Over the past month, what impact did physical pain have on your daily work (including both housework and paid work)?

1. A great deal    2. Much    3. Somewhat    4. Little    5. Not at all

Q308. Over the past month, have you experienced any of the following events? Please select the numbers indicating the frequencies of these events.

|                                                                                   | Never | Once | At least twice |
|-----------------------------------------------------------------------------------|-------|------|----------------|
| Subjected to mental blow                                                          | 1     | 2    | 3              |
| Hospitalized due to illness or operation                                          | 1     | 2    | 3              |
| Having relatives suffering from serious illness, injury or attack (be beaten up)  | 1     | 2    | 3              |
| Death of family members                                                           | 1     | 2    | 3              |
| Death of close friends or relatives                                               | 1     | 2    | 3              |
| Divorce/marital separation                                                        | 1     | 2    | 3              |
| End of a stable relationship (e.g., divorce or break up with boy/girlfriends)     | 1     | 2    | 3              |
| Vehement disputes with close friends, relatives, or neighbors (e.g., a quarrel)   | 1     | 2    | 3              |
| Severe financial hardship                                                         | 1     | 2    | 3              |
| Being fired                                                                       | 1     | 2    | 3              |
| Being homeless                                                                    | 1     | 2    | 3              |
| Lack of food/money                                                                | 1     | 2    | 3              |
| Valuables stolen or missing                                                       | 1     | 2    | 3              |
| Disputes with police, public security or other law enforcement personnel          | 1     | 2    | 3              |
| Failure to find a job                                                             | 1     | 2    | 3              |
| Sexual assault (e.g., being raped or forced to have sex)                          | 1     | 2    | 3              |
| Being detained or administratively punished                                       | 1     | 2    | 3              |
| Physical harm (being beaten up)                                                   | 1     | 2    | 3              |
| Being rejected because of HIV status (e.g., job, school, or social welfare, etc.) | 1     | 2    | 3              |
| Having family members being social isolated by others due to my HIV status        | 1     | 2    | 3              |

**The following questions are about your physical activities and the time spent on them, including paid work, household work, cleaning up backyard/balcony, transportation, leisure activities, and exercises.**

Q309. Physical activities over the past 7 days compared to usual

1. more than usual    2. Less than usual    3. Almost the same

Please recall all the vigorous activities you have had over the past 7 days. You may feel exhausted, breath much faster than usual, sweat a lot, and have much faster heart rates, through these activities, such as running, mountain/slope climbing, constant fast swimming (excluding slow swimming, playing with water, and being soaked in water), climbing stairs, aerobic dances/exercise, speed cycling, tennis single, playing basketball/soccer, rope skipping, weight training, carrying heavy loads (> 10 kilograms), or spading earth.

Q310. Over the past 7 days, how many days have you had vigorous activities? (continued > 10 minutes) \_\_\_\_ days.

No vigorous activities (**please skip to Q312**).

Q311. How much time did you usually spend on vigorous activities each day?

\_\_\_\_\_ hours \_\_\_\_\_ minutes  don't know/not sure

Please recall all the moderate activities you have had over the past 7 days. You may feel somewhat tired, breathe somewhat faster than usual, sweat more or less, and have faster heart rates through these activities, such as descending mountains, hiking, swimming at an average speed, going downstairs, dancing (excluding aerobic dance, slow dance, internal standard dance, or Yuan Ji dance), Tai chi, cycling at an average speed, walking while carrying something somewhat heavy (e.g., food shopping, carrying children on back/in arms; being somewhat heavy can be from 4.5 to 9 kilograms, such as two packs of A4 paper, two bottles of milk, a medium-sized watermelon, three pineapples, 5-kilogram rice, three red bricks, 7 glass bottles of beer or rice wine, a package of 24 cans of drinks), cleaning up backyard/balcony, housework (cleaning windows, cleaning floors by hand, making bed, handwashing clothes, handwashing cars), or tennis double, badminton, billiards, volleyball, baseball? Please don't count in walking while carrying light items, but please consider those physical activities that may last over 10 minutes.

Q312. Over the past 7 days, how many days have you had moderate activities?

\_\_\_\_\_ days.

No moderate activities (**please skip to Q314**).

Q313. How much time did you usually spend on moderate activities each day?

\_\_\_\_\_ hours \_\_\_\_\_ minutes  don't know/not sure

Please recall over the past 7 days, how long did you spend on walking, including walking during paid work/housework, for transportation, for the purpose of leisure, exercises, and recreation (excluding walking up/down stairs, ascending/descending hills/mountains).

Q314. Over the past 7 days, how many days have you walked constantly more than 10 minutes?

\_\_\_\_\_ days.

No walking constantly more than 10 minutes (**please skip to Q316**).

Q315. How much time did you usually spend on walking each day?

\_\_\_\_\_ hours \_\_\_\_\_ minutes  don't know/not sure

Q316. Over the past 7 days, how long have you sat? please count in time spent on sitting during paid work, housework, assignments, and leisure activities, including sitting at a desk, working on a computer, visiting friends, dining, reading, sitting or reclining to watch TV, please don't count in time of being asleep.

Over the past 7 days, how much time did you sit each day?

\_\_\_\_\_ hours \_\_\_\_\_ minutes  don't know/not sure

#### Part IV Mental health

Q401. Do you agree with the following statement? Please select the answer which most applies to you.

|                                                               | Completely disagree | Disagree | Agree | Completely agree |
|---------------------------------------------------------------|---------------------|----------|-------|------------------|
| I feel guilty because I'm infected with HIV                   | 1                   | 2        | 3     | 4                |
| People's attitudes make me feel worse about myself            | 1                   | 2        | 3     | 4                |
| People with HIV lose their jobs when their employers find out | 1                   | 2        | 3     | 4                |
| I feel I'm inferior to others because I'm infected with HIV   | 1                   | 2        | 3     | 4                |
| People with HIV are socially isolated                         | 1                   | 2        | 3     | 4                |
| Most people believe people with HIV being dirty               | 1                   | 2        | 3     | 4                |

|                                                                                     | <b>Completely disagree</b> | <b>Disagree</b> | <b>Agree</b> | <b>Completely agree</b> |
|-------------------------------------------------------------------------------------|----------------------------|-----------------|--------------|-------------------------|
| I avoid making new friends because I'm infected with HIV                            | 1                          | 2               | 3            | 4                       |
| Having HIV makes me feel myself unclean                                             | 1                          | 2               | 3            | 4                       |
| Ever since I knew I'm HIV-positive, I feel being isolated from the rest of the work | 1                          | 2               | 3            | 4                       |
| Most people consider people with HIV being disgusting                               | 1                          | 2               | 3            | 4                       |
| Having HIV makes me feel that I'm a bad person                                      | 1                          | 2               | 3            | 4                       |
| Most people with HIV are rejected when others find out                              | 1                          | 2               | 3            | 4                       |
| Most people are uncomfortable when being around with someone with HIV               | 1                          | 2               | 3            | 4                       |
| Having HIV in my body is disgusting to me                                           | 1                          | 2               | 3            | 4                       |

Q402. Please select a proper answer which best represents the ways you have felt or behaved in the past week:

|                                                       | <b>Never or almost never<br/>(less than 1 day per week)</b> | <b>Sometimes<br/>(1-2 days per week)</b> | <b>Fairly Often<br/>(3-4 days per week)</b> | <b>Very Often<br/>(5-7days per week)</b> |
|-------------------------------------------------------|-------------------------------------------------------------|------------------------------------------|---------------------------------------------|------------------------------------------|
| I was bothered by things that usually don't bother me | 1                                                           | 2                                        | 3                                           | 4                                        |
| I had trouble concentrating on what I was doing       | 1                                                           | 2                                        | 3                                           | 4                                        |
| I felt depressed                                      | 1                                                           | 2                                        | 3                                           | 4                                        |
| I had difficulties in doing everything                | 1                                                           | 2                                        | 3                                           | 4                                        |
| I felt hopeful about the future                       | 1                                                           | 2                                        | 3                                           | 4                                        |
| I felt fearful                                        | 1                                                           | 2                                        | 3                                           | 4                                        |
| My sleep was restless                                 | 1                                                           | 2                                        | 3                                           | 4                                        |
| I was happy                                           | 1                                                           | 2                                        | 3                                           | 4                                        |
| I felt lonely                                         | 1                                                           | 2                                        | 3                                           | 4                                        |
| I could not get "going"                               | 1                                                           | 2                                        | 3                                           | 4                                        |

Q403. The following statements are related to interpersonal relationships. Please select the answer that best describes your situations.

|                                                                          | <b>Strongly disagree</b> | <b>Disagree</b> | <b>Almost agree</b> | <b>Agree</b> | <b>Strongly agree</b> |
|--------------------------------------------------------------------------|--------------------------|-----------------|---------------------|--------------|-----------------------|
| I feel it is hard to be social with other people                         | 1                        | 2               | 3                   | 4            | 5                     |
| I feel it is hard to make friends                                        | 1                        | 2               | 3                   | 4            | 5                     |
| I feel it is hard to be comfortable around other people                  | 1                        | 2               | 3                   | 4            | 5                     |
| I feel it is hard to insist in my own opinions despite what others think | 1                        | 2               | 3                   | 4            | 5                     |
| I feel it is hard to disagree with other people                          | 1                        | 2               | 3                   | 4            | 5                     |
| I feel it is hard to tell personal things to other people                | 1                        | 2               | 3                   | 4            | 5                     |
| I feel it is hard to confide my feelings to other people                 | 1                        | 2               | 3                   | 4            | 5                     |
| I feel it is hard to take care of both others' and my own interests      | 1                        | 2               | 3                   | 4            | 5                     |

|                                                                | <b>Strongly disagree</b> | <b>Disagree</b> | <b>Almost agree</b> | <b>Agree</b> | <b>Strongly agree</b> |
|----------------------------------------------------------------|--------------------------|-----------------|---------------------|--------------|-----------------------|
| I feel it is hard to really care about other people's problems | 1                        | 2               | 3                   | 4            | 5                     |
| I feel it is hard to put somebody else's needs before my own   | 1                        | 2               | 3                   | 4            | 5                     |
| I lose my temper too easily                                    | 1                        | 2               | 3                   | 4            | 5                     |
| I'm always arguing with others                                 | 1                        | 2               | 3                   | 4            | 5                     |
| I'm always fighting with other people                          | 1                        | 2               | 3                   | 4            | 5                     |
| I get irritated or annoyed too easily                          | 1                        | 2               | 3                   | 4            | 5                     |
| I open up to people too much                                   | 1                        | 2               | 3                   | 4            | 5                     |
| I tell personal things to other people too much                | 1                        | 2               | 3                   | 4            | 5                     |
| I am overly generous to other people                           | 1                        | 2               | 3                   | 4            | 5                     |
| I am envious and jealous of other people too much              | 1                        | 2               | 3                   | 4            | 5                     |
| I worry about other people's reactions to me too much          | 1                        | 2               | 3                   | 4            | 5                     |
| I am overly dependent on other people                          | 1                        | 2               | 3                   | 4            | 5                     |

Q404. Have any of the following ever happened to you? Select the answer that describes your situation the best.

| When I am upset or in a bad mood:                                   | <b>Almost never</b> | <b>Occasionally</b> | <b>Sometimes</b> | <b>Mostly</b> | <b>Almost always</b> |
|---------------------------------------------------------------------|---------------------|---------------------|------------------|---------------|----------------------|
| I feel I am weak                                                    | 1                   | 2                   | 3                | 4             | 5                    |
| I feel ashamed for being this way                                   | 1                   | 2                   | 3                | 4             | 5                    |
| I have difficulty concentrating                                     | 1                   | 2                   | 3                | 4             | 5                    |
| I have difficulty getting work done                                 | 1                   | 2                   | 3                | 4             | 5                    |
| I have difficulty thinking about anything else                      | 1                   | 2                   | 3                | 4             | 5                    |
| I have difficulty controlling my behaviors                          | 1                   | 2                   | 3                | 4             | 5                    |
| I feel out of control                                               | 1                   | 2                   | 3                | 4             | 5                    |
| I'll double-check my emotions                                       | 1                   | 2                   | 3                | 4             | 5                    |
| I spend time on figuring out my real feelings                       | 1                   | 2                   | 3                | 4             | 5                    |
| I believe that I'll end up feeling very depressed                   | 1                   | 2                   | 3                | 4             | 5                    |
| I believe that I will remain that way for a long time               | 1                   | 2                   | 3                | 4             | 5                    |
| I believe that I will be stuck in this and have no alternatives     | 1                   | 2                   | 3                | 4             | 5                    |
| It takes me a long time to get better                               | 1                   | 2                   | 3                | 4             | 5                    |
| I believe that there is nothing I can do to make myself feel better | 1                   | 2                   | 3                | 4             | 5                    |
| My emotions make me overwhelmed                                     | 1                   | 2                   | 3                | 4             | 5                    |
| I start to feel very bad about myself                               | 1                   | 2                   | 3                | 4             | 5                    |
| I have no idea how I am feeling                                     | 1                   | 2                   | 3                | 4             | 5                    |
| I am confused about how I feel                                      | 1                   | 2                   | 3                | 4             | 5                    |

Q405. In the past 6 months, have you received other psychological counseling or guidance services besides HIV testing and counseling?

1. I don't know what is psychological counseling/guidance
2. I don't know where they provide such services
3. I know where I can find it but I've never been there
4. Yes, I have received such services

## Part V Social support

Q501. Over the past three months, was there anyone available to help and support you? Did it happen often?

| When you in need, someone was available for you to:                                                   | <b>Almost<br/>never</b> | <b>Seldom</b> | <b>Sometimes</b> | <b>Often</b> | <b>Almost<br/>always</b> |
|-------------------------------------------------------------------------------------------------------|-------------------------|---------------|------------------|--------------|--------------------------|
| Count on to listen to you when you need to talk                                                       | 1                       | 2             | 3                | 4            | 5                        |
| Give you good advice about crisis                                                                     | 1                       | 2             | 3                | 4            | 5                        |
| Take you to the doctor if you needed it                                                               | 1                       | 2             | 3                | 4            | 5                        |
| Show you love and sympathy                                                                            | 1                       | 2             | 3                | 4            | 5                        |
| Have a good time with you                                                                             | 1                       | 2             | 3                | 4            | 5                        |
| Provide you information to help you understand current situation                                      | 1                       | 2             | 3                | 4            | 5                        |
| Trust and talk to about your difficulties                                                             | 1                       | 2             | 3                | 4            | 5                        |
| Hug you                                                                                               | 1                       | 2             | 3                | 4            | 5                        |
| Get together with for relaxation                                                                      | 1                       | 2             | 3                | 4            | 5                        |
| Give you advice you really want                                                                       | 1                       | 2             | 3                | 4            | 5                        |
| Do things with to help you get your mind off troubles                                                 | 1                       | 2             | 3                | 4            | 5                        |
| Help with daily chores when you were sick                                                             | 1                       | 2             | 3                | 4            | 5                        |
| Share your most private worries and fears with                                                        | 1                       | 2             | 3                | 4            | 5                        |
| Turn to for suggestions about how to deal with personal problems                                      | 1                       | 2             | 3                | 4            | 5                        |
| Do something enjoyable with                                                                           | 1                       | 2             | 3                | 4            | 5                        |
| Understand your problems                                                                              | 1                       | 2             | 3                | 4            | 5                        |
| Give you love and make you feel yourself worthwhile                                                   | 1                       | 2             | 3                | 4            | 5                        |
| Help you if you were sick                                                                             | 1                       | 2             | 3                | 4            | 5                        |
| Prepare your meals if you were unable to do it yourself                                               | 1                       | 2             | 3                | 4            | 5                        |
| Help you with routine household chores (e.g., replacing lightbulbs, unblocking drains)                | 1                       | 2             | 3                | 4            | 5                        |
| Help with your activities of daily living such as bathing, toileting, dressing, and grooming          | 1                       | 2             | 3                | 4            | 5                        |
| Help you get care from hospital or feed you medicines                                                 | 1                       | 2             | 3                | 4            | 5                        |
| Provide financial aid                                                                                 | 1                       | 2             | 3                | 4            | 5                        |
| Assist you in locating social services such as community volunteer clinic                             | 1                       | 2             | 3                | 4            | 5                        |
| Assist you in looking for job                                                                         | 1                       | 2             | 3                | 4            | 5                        |
| Assist you with your participation in community-based activities such as community knowledge lectures | 1                       | 2             | 3                | 4            | 5                        |
| Communicate knowledge related to HIV transmission with you                                            | 1                       | 2             | 3                | 4            | 5                        |
| Communicate knowledge related to HIV medication, treatment, and side effects with you                 | 1                       | 2             | 3                | 4            | 5                        |



Q502. Over the past three months, from which of the following people did you get help and support when you needed?

|                                                                | None | Occasionally | Sometimes | Often | Always |
|----------------------------------------------------------------|------|--------------|-----------|-------|--------|
| Parents                                                        | 1    | 2            | 3         | 4     | 5      |
| Spouse or boy/girlfriend                                       | 1    | 2            | 3         | 4     | 5      |
| Siblings                                                       | 1    | 2            | 3         | 4     | 5      |
| Relatives                                                      | 1    | 2            | 3         | 4     | 5      |
| Children                                                       | 1    | 2            | 3         | 4     | 5      |
| Neighbors                                                      | 1    | 2            | 3         | 4     | 5      |
| Friends (other than boy/girlfriend)                            | 1    | 2            | 3         | 4     | 5      |
| Healthcare providers/CDC staffs                                | 1    | 2            | 3         | 4     | 5      |
| Coworkers/employers                                            | 1    | 2            | 3         | 4     | 5      |
| Community members (boards)/rural township or village officials | 1    | 2            | 3         | 4     | 5      |
| Internet friends                                               | 1    | 2            | 3         | 4     | 5      |
| Other people living with HIV                                   | 1    | 2            | 3         | 4     | 5      |
| Others (please state) _____                                    |      |              |           |       |        |

Q503. Over the past three months, did you use the following methods to alleviate HIV-related symptoms and stress?

|                                                                                  | Never | Occasionally | Sometimes | Often | Always |
|----------------------------------------------------------------------------------|-------|--------------|-----------|-------|--------|
| Stay at home and rest                                                            | 1     | 2            | 3         | 4     | 5      |
| Go vacationing                                                                   | 1     | 2            | 3         | 4     | 5      |
| Relax until I feel better                                                        | 1     | 2            | 3         | 4     | 5      |
| Try various ways to escape                                                       | 1     | 2            | 3         | 4     | 5      |
| Believe symptoms will gradually disappear                                        | 1     | 2            | 3         | 4     | 5      |
| Believe symptoms are a part of life                                              | 1     | 2            | 3         | 4     | 5      |
| Feel symptoms are not very severe                                                | 1     | 2            | 3         | 4     | 5      |
| Accept the fact that symptoms of HIV such as fever and feeling weak have emerged | 1     | 2            | 3         | 4     | 5      |
| Prepare for the worst                                                            | 1     | 2            | 3         | 4     | 5      |
| Consider it as my destiny                                                        | 1     | 2            | 3         | 4     | 5      |
| Make necessary changes in my life in order to adapt to my symptoms               | 1     | 2            | 3         | 4     | 5      |
| Look for someone to take care of me                                              | 1     | 2            | 3         | 4     | 5      |
| Look for someone to be with me                                                   | 1     | 2            | 3         | 4     | 5      |
| Talk to someone about how I'm feeling                                            | 1     | 2            | 3         | 4     | 5      |
| Ask for professional helps (doctors, nurses, etc.)                               | 1     | 2            | 3         | 4     | 5      |
| Ask the family and friends for help                                              | 1     | 2            | 3         | 4     | 5      |
| Observe whether symptoms got better                                              | 1     | 2            | 3         | 4     | 5      |
| Focus on whether symptoms get worse                                              | 1     | 2            | 3         | 4     | 5      |
| Focus on whether other symptoms emerged                                          | 1     | 2            | 3         | 4     | 5      |
| Try to divert my attention                                                       | 1     | 2            | 3         | 4     | 5      |
| Try to pretend that nothing happened                                             | 1     | 2            | 3         | 4     | 5      |
| Try hard to forget my feelings                                                   | 1     | 2            | 3         | 4     | 5      |
| Keep symptoms from disturbing my activities of daily life                        | 1     | 2            | 3         | 4     | 5      |

|                                                           | Never | Occasionally | Sometimes | Often | Always |
|-----------------------------------------------------------|-------|--------------|-----------|-------|--------|
| Inquire about and understand symptoms by various channels | 1     | 2            | 3         | 4     | 5      |
| Learn from those who had the same symptoms                | 1     | 2            | 3         | 4     | 5      |
| See whether others had the same feelings                  | 1     | 2            | 3         | 4     | 5      |
| Enjoy the present                                         | 1     | 2            | 3         | 4     | 5      |
| Look for stimuli in order to forget unhappy memories      | 1     | 2            | 3         | 4     | 5      |

**Part VI Family relationships and disclosure** (questions in this section are related to children; if you have more than one child, questions are generally related to the child you agree to permit to participate in our study, so please answer the questions according to his/her circumstances)

**I. Family relations.** The following questions are asked about family relations, please choose the answer that best describes your situation.

Q601. Generally speaking, do you think you get along well with your spouse or regular partner?

1. always      2. mostly      3. sometimes      4. occasionally      5. seldom      6. never

Q602. How do the following statements about your relationships with your spouse or regular partner correspond to your situations?

|                                       | Not at all | Somewhat | Mostly | Completely |
|---------------------------------------|------------|----------|--------|------------|
| Help each other                       | 1          | 2        | 3      | 4          |
| Take care of each other               | 1          | 2        | 3      | 4          |
| Trust each other                      | 1          | 2        | 3      | 4          |
| Full of deceit and falsehood          | 1          | 2        | 3      | 4          |
| Seemingly in harmony but actually not | 1          | 2        | 3      | 4          |
| Exploit each other                    | 1          | 2        | 3      | 4          |

Q603. How do the following statements correspond to your situations?

|                                                                            | Strong disagree | Disagree | Neutral | Agree | Strongly agree |
|----------------------------------------------------------------------------|-----------------|----------|---------|-------|----------------|
| Family members are satisfied with how they communicate with each other     | 1               | 2        | 3       | 4     | 5              |
| Family members are very good listeners                                     | 1               | 2        | 3       | 4     | 5              |
| Family members express love and kinship to each other                      | 1               | 2        | 3       | 4     | 5              |
| Family members are able to ask each other for what they want               | 1               | 2        | 3       | 4     | 5              |
| Family members can calmly discuss problems with each other                 | 1               | 2        | 3       | 4     | 5              |
| Family members discuss ideas and beliefs with each other                   | 1               | 2        | 3       | 4     | 5              |
| When family members ask each other questions, they get honest answers      | 1               | 2        | 3       | 4     | 5              |
| Family members try to understand each other's feelings                     | 1               | 2        | 3       | 4     | 5              |
| Family members seldom say negative things about each other even when angry | 1               | 2        | 3       | 4     | 5              |
| Family members express their true feelings to each other                   | 1               | 2        | 3       | 4     | 5              |

Q604. The following questions are about parent-children communication, please choose the answers that best correspond to your situations.

|                                                                                                | Yes | No |
|------------------------------------------------------------------------------------------------|-----|----|
| Do you often talk to your children about important things?                                     | 1   | 2  |
| If you concern something might happen to your family, are you going to let your children know? | 1   | 2  |
| Do you often tell your children your true feeling about different things?                      | 1   | 2  |
| Have you ever told your children any things you are embarrassed with?                          | 1   | 2  |
| Is it important to let your children know your merits and demerits?                            | 1   | 2  |
| Do you prefer your children to know your true self?                                            | 1   | 2  |
| Have you talked a lot with your children about your childhood experiences?                     | 1   | 2  |

## II. Spousal disclosure

Q605. Does your spouse know your HIV status? (If answering 2 or 3, go to Q609)

1. Yes            2. No            3. I don't know

Q606. If your spouse already knew your HIV status, when did he/she know (how long after you were diagnosed)?

1. The day I was diagnosed            2. Within a week            3. Within a month  
4. Within 3 months            5. Over 3 months, but within a year            6. Over a year

Q607. How did he/she know your HIV status?

1. I planned to tell him/her            2. I accidentally disclosed            3. I told him/her after he/she asked me  
4. Others told him/her without my approval            5. Others told him/her after getting my approval  
6. Medical staff told him/her            7. Other (state \_\_\_\_\_)

Q608. Do you regret disclosing your HIV status to your spouse?    1. No            2. Somewhat            3. Very much

Q609. Please assess the impact of HIV disclosure to spouse

| Generally speaking,                  | Very negative | Negative | Positive | Very positive |
|--------------------------------------|---------------|----------|----------|---------------|
| Impact on your life                  | 1             | 2        | 3        | 4             |
| Impact on affections between spouses | 1             | 2        | 3        | 4             |
| Impact on family relations           | 1             | 2        | 3        | 4             |

## III. Parental disclosure

Q610. Do you agree to the following statements about HIV disclosure to children? Please select the answer that best correspond to your situations.

|                                                                                                   | Strongly disagree | Disagree | Agree | Strongly agree |
|---------------------------------------------------------------------------------------------------|-------------------|----------|-------|----------------|
| It's better for children to learn their parents' HIV status from their parents rather than others | 1                 | 2        | 3     | 4              |
| Children become more supportive after knowing my HIV status                                       | 1                 | 2        | 3     | 4              |
| Disclosing to children helps relieve my mental distress                                           | 1                 | 2        | 3     | 4              |
| Children have a right to know                                                                     | 1                 | 2        | 3     | 4              |
| I must be honest when children ask about me being sick                                            | 1                 | 2        | 3     | 4              |
| Whether disclosing to children depends on if the disclosure is beneficial to them                 | 1                 | 2        | 3     | 4              |

|                                                                                             | <b>Strongly disagree</b> | <b>Disagree</b> | <b>Agree</b> | <b>Strongly agree</b> |
|---------------------------------------------------------------------------------------------|--------------------------|-----------------|--------------|-----------------------|
| Whether disclosing to children depends on if children are mentally prepared                 | 1                        | 2               | 3            | 4                     |
| Disclosure to children is helpful to protect them from high-risk behaviors                  | 1                        | 2               | 3            | 4                     |
| Disclosure to children is helpful for them to be mature and independent as soon as possible | 1                        | 2               | 3            | 4                     |
| Disclosure to children is helpful for them to be mentally prepared for my health status     | 1                        | 2               | 3            | 4                     |
| Disclosure to children will make their childhood less happy                                 | 1                        | 2               | 3            | 4                     |
| Knowing my HIV status will negatively affect children's academic performance                | 1                        | 2               | 3            | 4                     |
| Knowing my HIV status will negatively affect children's mental health                       | 1                        | 2               | 3            | 4                     |
| Parent-children relationships can be damaged if children know my HIV status                 | 1                        | 2               | 3            | 4                     |

Q611. What factors may affect your decision in terms of disclosing your HIV status to your children? (multiple answers allowed)

1. His/her age    2. His/her gender    3. His/her personality    4. His/her stress tolerance  
5. His/her psychological status    6. My health status    7. My spouse's opinion  
8. Relationship with children    9. Whether he/she can keep it secret    10. Other\_\_\_\_\_

Q612. Have you considered the details in terms of disclosing your HIV diagnosis to your children? Please select the answer that best describes the situations.

| Have you considered the following specific issues related to disclosure | <b>I am not going to consider</b> | <b>I have not considered yet</b> | <b>I am considering</b> | <b>I have planned</b> |
|-------------------------------------------------------------------------|-----------------------------------|----------------------------------|-------------------------|-----------------------|
| When to tell                                                            | 1                                 | 2                                | 3                       | 4                     |
| Who to tell                                                             | 1                                 | 2                                | 3                       | 4                     |
| How to tell                                                             | 1                                 | 2                                | 3                       | 4                     |
| How to explain what HIV is                                              | 1                                 | 2                                | 3                       | 4                     |
| How to explain how I was infected with HIV                              | 1                                 | 2                                | 3                       | 4                     |
| How to deal with his/her responses                                      | 1                                 | 2                                | 3                       | 4                     |
| Possible questions he/she may ask                                       | 1                                 | 2                                | 3                       | 4                     |
| Whom to talk to about disclosure details                                | 1                                 | 2                                | 3                       | 4                     |
| Where can I seek professional assistance in terms of disclosure         | 1                                 | 2                                | 3                       | 4                     |

Q613. Do you have any concerns/worries in terms of disclosing your HIV status to your children? Please select the answer that best describes the degree of worry.

|                                                                             | <b>Not at all worried</b> | <b>Not very worried</b> | <b>Somewhat worried</b> | <b>Very worried</b> |
|-----------------------------------------------------------------------------|---------------------------|-------------------------|-------------------------|---------------------|
| Children are too young to understand HIV                                    | 1                         | 2                       | 3                       | 4                   |
| I do not know how to explain HIV to children                                | 1                         | 2                       | 3                       | 4                   |
| I don't know how to control my emotions when telling children my HIV status | 1                         | 2                       | 3                       | 4                   |
| I do not know how to deal with children's responses afterwards              | 1                         | 2                       | 3                       | 4                   |
| Children will reject me after knowing my HIV status                         | 1                         | 2                       | 3                       | 4                   |
| Children will reject me after knowing how I was infected with HIV           | 1                         | 2                       | 3                       | 4                   |
| Children will not respect me anymore after knowing my HIV status            | 1                         | 2                       | 3                       | 4                   |
| Children may tell my HIV status to others                                   | 1                         | 2                       | 3                       | 4                   |

Q614. What do you think is an appropriate age for telling your children your HIV status? \_\_\_\_\_ years old

Q615. Who else do you think should be there when disclosing HIV status to your children?

1. Spouse      2. Siblings      3. Other family members      4. Professionals      5. Nobody else

Q616. Will or did you request your children not to disclose your HIV status to anyone else?      1. Yes      2. No

Q617. Will or did you specify a person whom you children could talk to about your HIV status?      1. yes      2. No

Q618. How confident are you in doing the following things?

|                                                                                              | <b>Not confident at all</b> | <b>Hardly confident</b> | <b>Not certain</b> | <b>Somewhat confident</b> | <b>Very confident</b> | <b>Have done</b> |
|----------------------------------------------------------------------------------------------|-----------------------------|-------------------------|--------------------|---------------------------|-----------------------|------------------|
| Knowing whether the child is mentally prepared to accept the fact that I'm infected with HIV | 1                           | 2                       | 3                  | 4                         | 5                     | 6                |
| Come up with a plan for how to disclose                                                      | 1                           | 2                       | 3                  | 4                         | 5                     | 6                |
| Come up with an age-appropriate way to explain what HIV is                                   | 1                           | 2                       | 3                  | 4                         | 5                     | 6                |
| Set a time and date to disclose                                                              | 1                           | 2                       | 3                  | 4                         | 5                     | 6                |
| Disclose to the child                                                                        | 1                           | 2                       | 3                  | 4                         | 5                     | 6                |
| Stay calm during disclosure                                                                  | 1                           | 2                       | 3                  | 4                         | 5                     | 6                |
| Appropriately deal with the child's emotional response during disclosure                     | 1                           | 2                       | 3                  | 4                         | 5                     | 6                |
| Talk to the child about HIV facts                                                            | 1                           | 2                       | 3                  | 4                         | 5                     | 6                |
| Answer HIV-related behavioral questions                                                      | 1                           | 2                       | 3                  | 4                         | 5                     | 6                |
| Tell the child frankly how I was infected with HIV                                           | 1                           | 2                       | 3                  | 4                         | 5                     | 6                |
| Explicitly tell the child I'm infected with HIV                                              | 1                           | 2                       | 3                  | 4                         | 5                     | 6                |

Q619. Do you need professional help for HIV disclosure to children?      1. Yes      2. No

Q620. What kind of help do you need? (**multiple choices allowed**)

1. Psychological guidance before disclosure
2. HIV/AIDS knowledge
3. Disclosure skills
4. Disclosure plan
5. Onsite assistance during disclosure
6. Disclose on my behalf
7. Psychological guidance for me after disclosure
8. Psychological guidance for children after disclosure
9. No help needed from professionals

Q621. Over the past 6 months, have you communicated with your child about your HIV diagnosis? (only one answer allowed)

1. Not yet, and I am not going to
2. Not yet, but I'm considering (e.g., when, how)
3. Not yet, but I have planned when to start
4. Yes, but I have not indicated that is HIV
5. Yes, I have told my children I have HIV
6. Yes, and I have told my child how I was infected with HIV

**Part VII Treatment adherence**

Q701. Over the past three months, how often did the following situations happen?

|                                                                                                              | Never | Rarely | Sometimes | Often | Always |
|--------------------------------------------------------------------------------------------------------------|-------|--------|-----------|-------|--------|
| Not got treated on time or adjusted my treatment plan because I was afraid of my child knowing my HIV status | 1     | 2      | 3         | 4     | 5      |
| I tried to avoid being seen by my children when getting treated                                              | 1     | 2      | 3         | 4     | 5      |
| I went to physicians with my children be with me                                                             | 1     | 2      | 3         | 4     | 5      |

Q702. Have you ever taken any medications that were used to treat HIV? (**If answering 3, the survey is completed. Thank you for your participation!**)

1. Yes, still using them now
2. Yes, but I stopped using now
3. Never used any medications

Q703. When did you start to take medication used to treat HIV? \_\_\_\_\_ year \_\_\_\_\_ month

Q704. Over the past 3 days, you needed to take medications for \_\_\_\_\_ times, you took medications on time for \_\_\_\_\_ times

Q705. Over the past month (30 days), how many days were you able to take medications on time? \_\_\_\_\_ days

Q706. Over the past three months, how often did the following situations happen?

|                                                                                | Never | Rarely | Sometimes | Often | Always |
|--------------------------------------------------------------------------------|-------|--------|-----------|-------|--------|
| Not take medications on time because I was afraid of being seen by my children | 1     | 2      | 3         | 4     | 5      |
| I tried to avoid being seen by my children when taking medications             | 1     | 2      | 3         | 4     | 5      |
| My children reminded me to take medications on time                            | 1     | 2      | 3         | 4     | 5      |
| My children picked up medications for me                                       | 1     | 2      | 3         | 4     | 5      |

**You have completed the survey. Thank you so much for your support and cooperation!**

**Note: This is the English version of the survey questionnaire. We used a Chinese version in the project evaluation.**
